# Supplementary material for: Interface and interlayer electron/exciton–phonon coupling of TMDs/InSe for efficient charge transfer and ultrafast dynamics: implications for field-effect devices
Source: Royal Society of Chemistry journal article supplement (doi:10.1039/d4ta05286b), 2024-01-01
Supplement: d4ta05286b1.pdf [file d4ta05286b1.pdf]

## Support Information

### Interface and Interlayer Electron/Exciton-Phonon Coupling of TMDs/InSe for Efficient Charge Transfer and Ultrafast Dynamics: Implications for Field-Effect Devices

Shan-Shan Kan<sup>1</sup>, Shi-Xuan Deng<sup>1</sup>, Xiao-Meng Jiang<sup>1</sup>, Yu-Xin Liu<sup>1</sup>, Ming-Kun Jiang<sup>1</sup>, Zhe-Kun Ren<sup>1</sup>, Cheng-Bao Yao<sup>1,\*</sup>

<sup>1</sup>Key Laboratory of Photonic and Electric Bandgap materials, Ministry of Education, School of Physics and Electronic Engineering, Harbin Normal University, Harbin, 150025, Heilongjiang Province, China

\*Corresponding author: yaochengbao5@163.com

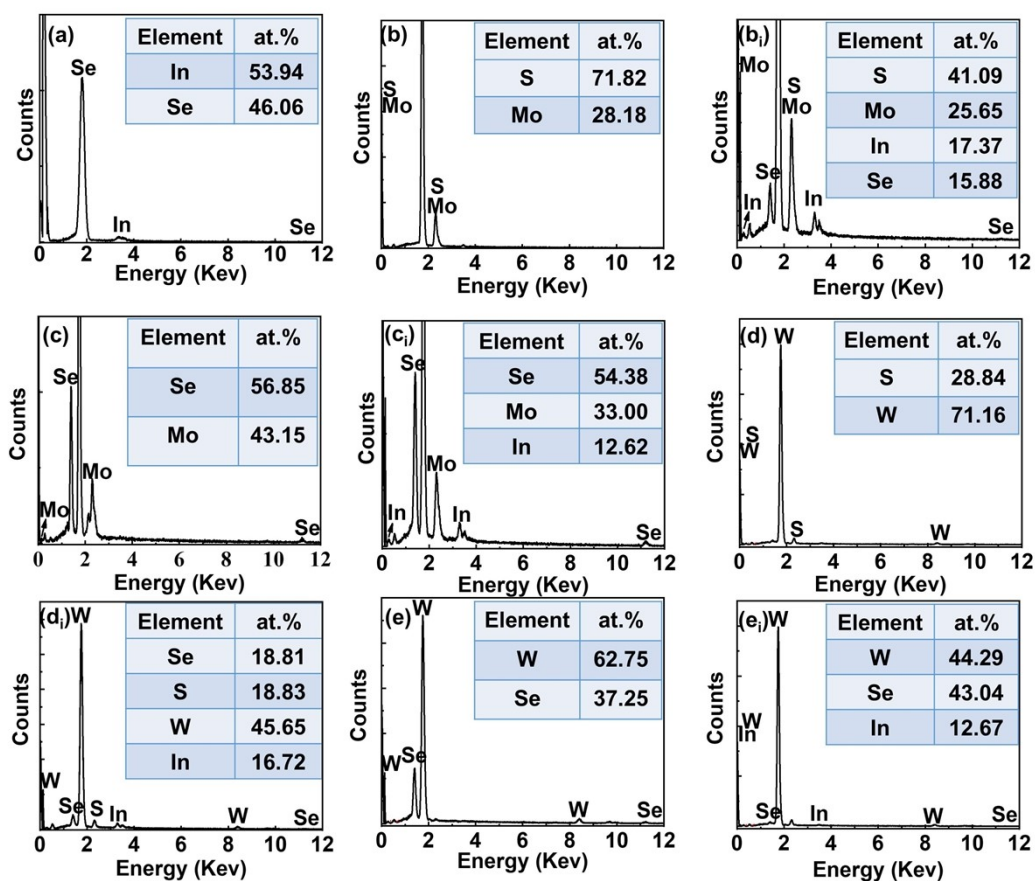

Fig. S1 EDS images of InSe (a), MoS<sub>2</sub> (b), MoSe<sub>2</sub> (c), WS<sub>2</sub> (d) and WSe<sub>2</sub> (e), and EDS images of MoS<sub>2</sub>/InSe (b<sub>i</sub>), MoSe<sub>2</sub>/InSe (c<sub>i</sub>), WS<sub>2</sub>/InSe (d<sub>i</sub>) and WSe<sub>2</sub>/InSe (e<sub>i</sub>).

**Tab. S1** Detailed summary of XRD data for samples.

| Phase                   | Peak (deg) | Planes | D (nm) | JCPDS   |
|-------------------------|------------|--------|--------|---------|
| <b>MoS<sub>2</sub></b>  | 28.5       | (004)  | 3.1325 | 75-1539 |
|                         | 39.5       | (103)  | 2.2789 |         |
|                         | 58.9       | (008)  | 1.5662 |         |
| <b>MoSe<sub>2</sub></b> | 13.7       | (002)  | 6.4600 | 29-914  |
|                         | 31.5       | (100)  | 2.8450 |         |
|                         | 58.0       | (112)  | 1.5910 |         |
|                         | 69.5       | (203)  | 1.3510 |         |
| <b>WS<sub>2</sub></b>   | 29.0       | (004)  | 3.0890 | 8-237   |
|                         | 58.5       | (008)  | 1.5458 |         |
|                         | 75.9       | (116)  | 1.2524 |         |
| <b>WSe<sub>2</sub></b>  | 13.6       | (002)  | 6.5100 | 6-80    |
|                         | 27.4       | (004)  | 3.2500 |         |
|                         | 31.3       | (100)  | 2.8500 |         |
|                         | 59.7       | (107)  | 1.5500 |         |
|                         | 76.0       | (205)  | 1.2500 |         |
| <b>γ-InSe</b>           | 10.6       | (003)  | 8.3167 | 70-2541 |
|                         | 31.4       | (015)  | 2.8456 |         |
|                         | 59.3       | (027)  | 1.5579 |         |
| <b>ε-InSe</b>           | 25.7       | (100)  | 3.4650 | 34-1431 |
|                         | 32.2       | (006)  | 2.7730 |         |

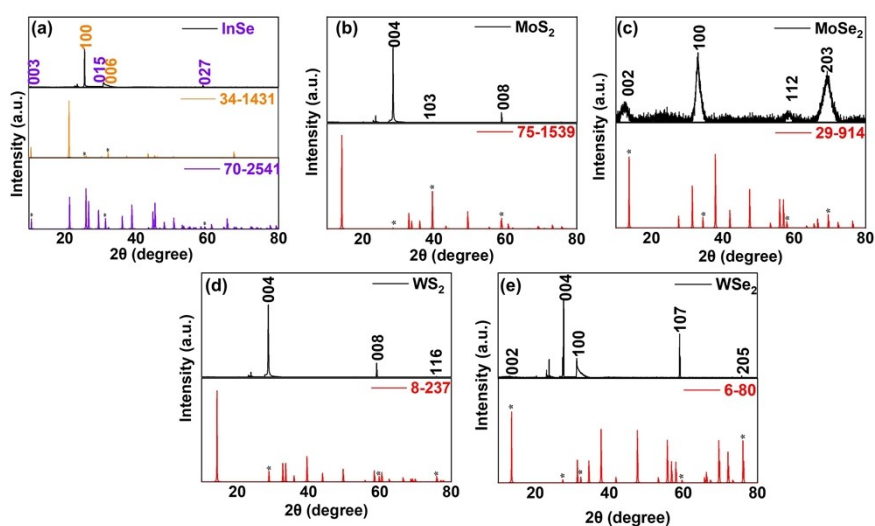

**Fig.S2** XRD pattern and standard cards of InSe (a), MoS<sub>2</sub> (b), MoSe<sub>2</sub> (c), WS<sub>2</sub> (d), and WSe<sub>2</sub> (e)

(Among them, 34-1431 corresponds to hexagonal InSe, and 70-2541 corresponds to rhombohedral

InSe.).

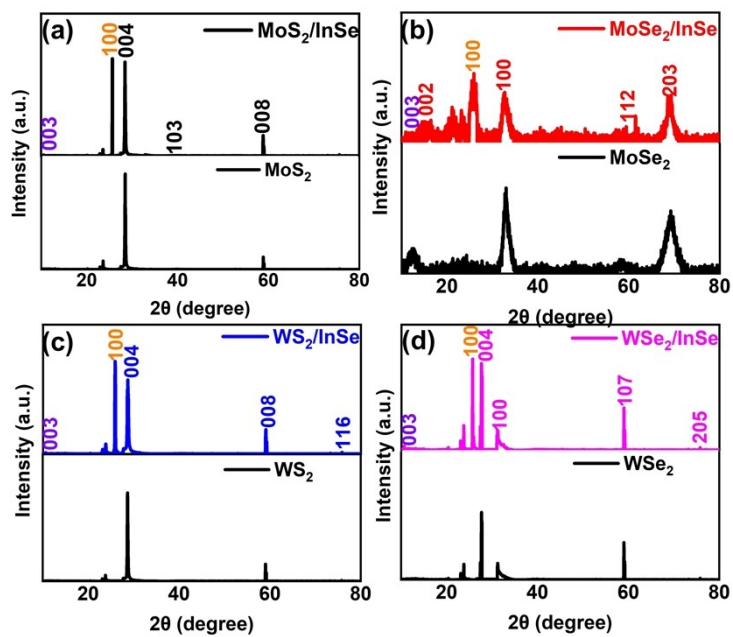

**Fig.S3** XRD pattern of MoS<sub>2</sub>/InSe and MoS<sub>2</sub> (a), MoSe<sub>2</sub>/InSe and MoSe<sub>2</sub> (b), WS<sub>2</sub>/InSe and WS<sub>2</sub> (c), and WSe<sub>2</sub>/InSe and WSe<sub>2</sub> (d)

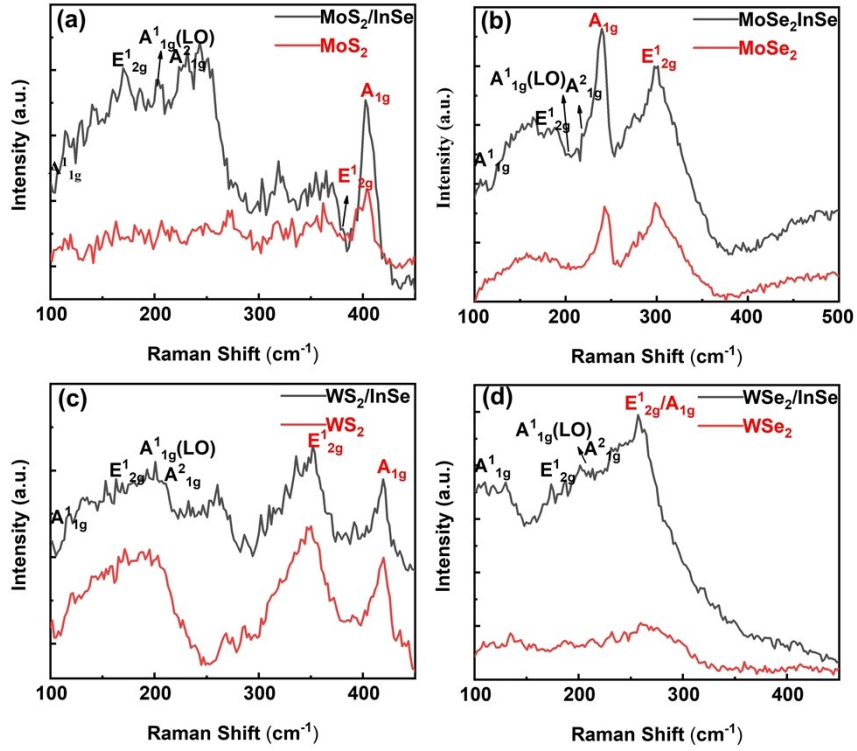

Fig. S4 Raman spectra of MoS<sub>2</sub>/InSe and MoS<sub>2</sub> (a), MoSe<sub>2</sub>/InSe and MoSe<sub>2</sub> (b), WS<sub>2</sub>/InSe and WS<sub>2</sub>

(c), and WSe<sub>2</sub>/InSe and WSe<sub>2</sub> (e)

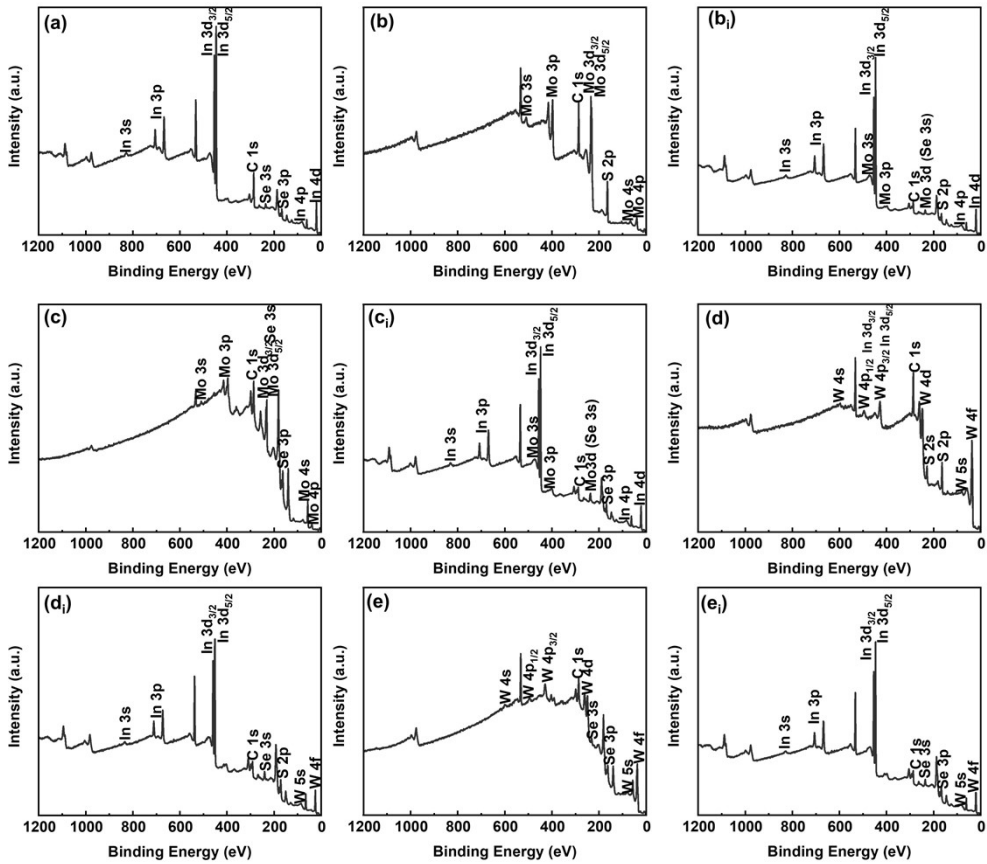

**Fig. S5** Low-resolution XPS spectra of InSe (a), MoS<sub>2</sub> (b), MoSe<sub>2</sub> (c), WS<sub>2</sub> (d) and WSe<sub>2</sub> (e). Low-resolution XPS spectra of MoS<sub>2</sub>/InSe (b<sub>i</sub>), MoSe<sub>2</sub>/InSe (c), WS<sub>2</sub>/InSe (d<sub>i</sub>) and WSe<sub>2</sub>/InSe (e<sub>i</sub>).

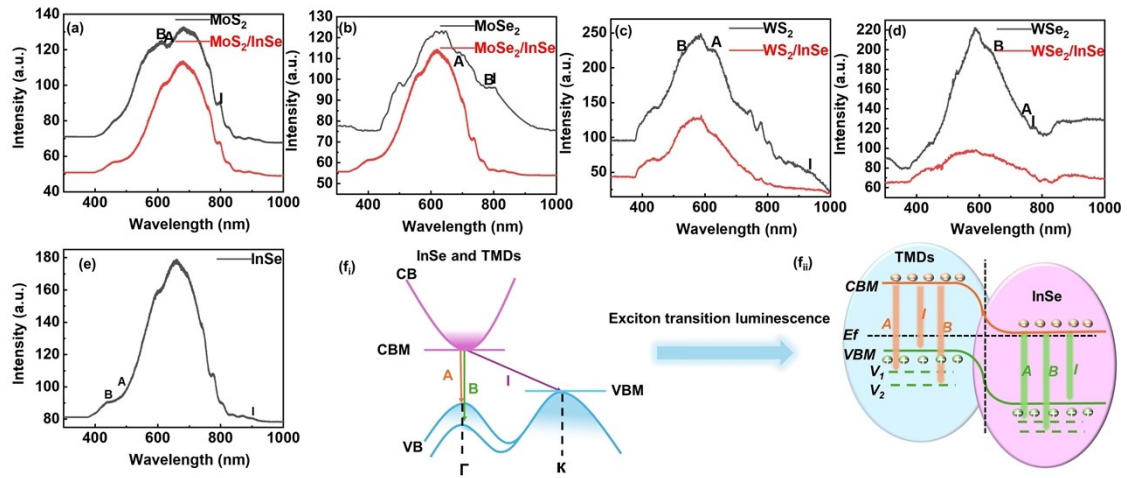

**Fig. S6** PL spectra of TMDs and TMDs/InSe (a-d) InSe (e). (fi) Exciton emission mechanism of InSe and TMDs. (fii) PL mechanism of TMDs/InSe heterojunctions.

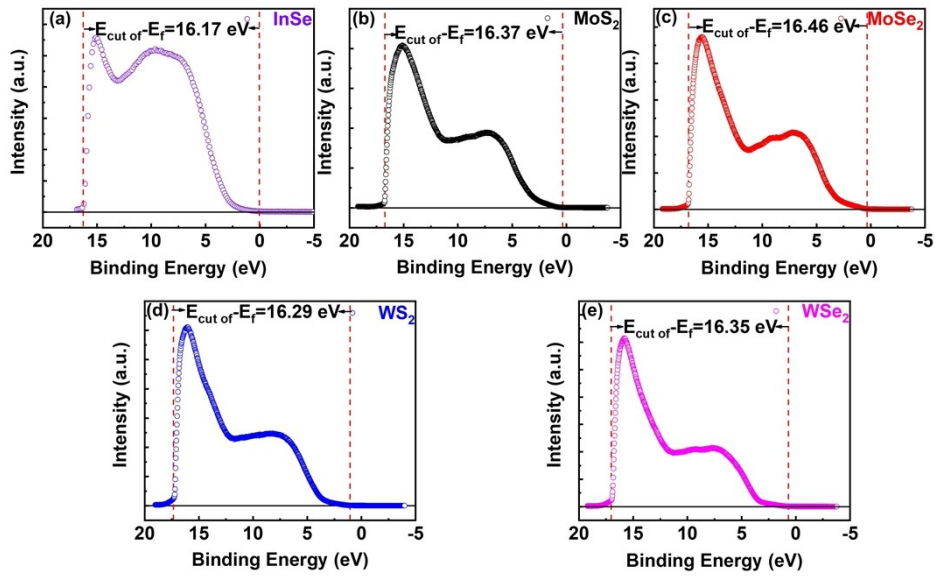

**Fig. S7** UPS images of InSe and TMDs.

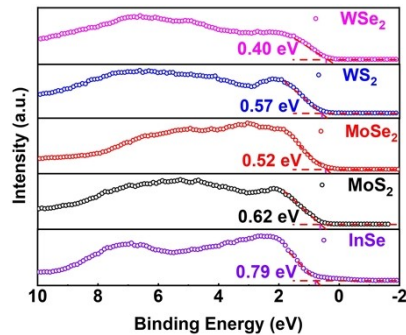

**Fig. S8** VB spectra of InSe and TMDs.

Tab. S2. Time constants of A-exciton decay (monitored around 500 nm) of InSe and TMDs/InSe

heterojunctions following 380 nm laser excitation.

|                         | $\tau_1$ (ps) | $\tau_2$ (ps) | $\tau_3$ (ps) |
|-------------------------|---------------|---------------|---------------|
| InSe                    | 0.09          | 16.82         | 753.69        |
| MoS <sub>2</sub> /InSe  | 0.14          | 234.69        | 841.09        |
| MoSe <sub>2</sub> /InSe | 0.12          | 19.82         | 778.66        |
| WS <sub>2</sub> /InSe   | 0.24          | 36.92         | 1256.70       |
| WSe <sub>2</sub> /InSe  | 0.69          | 235.59        | 1015.69       |

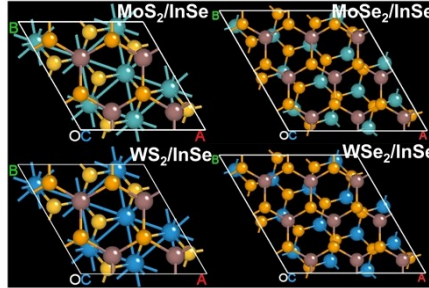

Fig. S9 TMDs/InSe heterojunctions atomic structure building model.

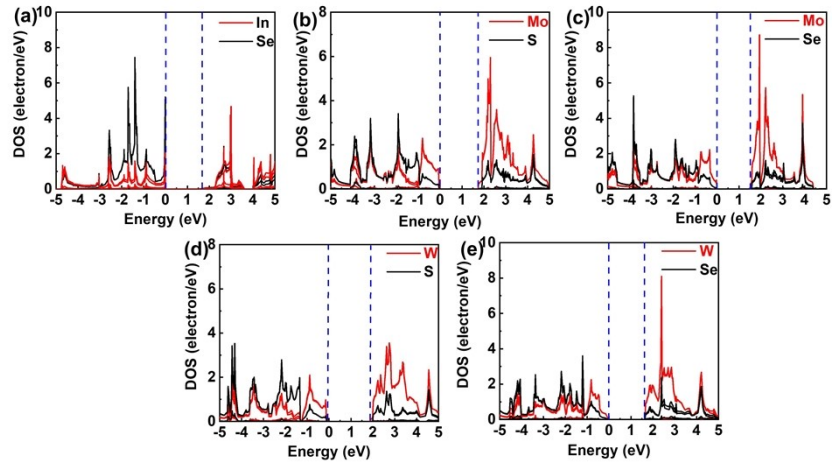

Fig. S10 PDOS of InSe (a), MoS<sub>2</sub> (b), MoSe<sub>2</sub> (c), WS<sub>2</sub> (d), and WSe<sub>2</sub> (e)

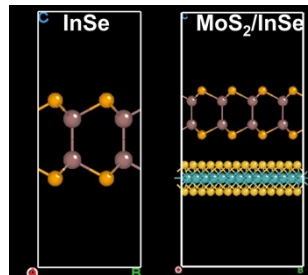

Fig. S11 Modeling of the calculated electron mobility of InSe and MoS<sub>2</sub>/InSe heterojunction.

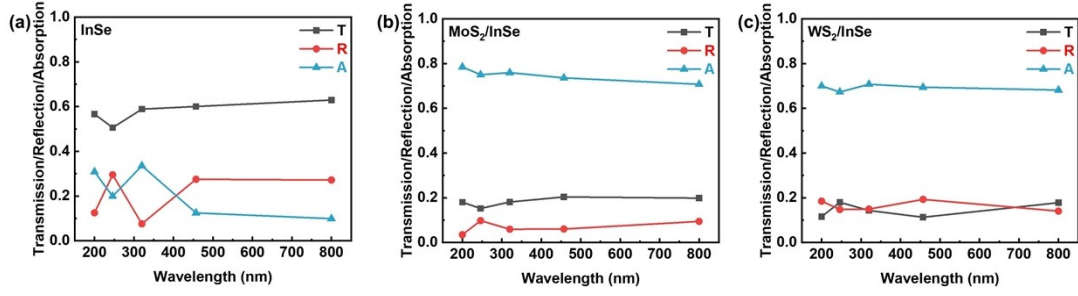

**Fig. S12.** Transmission, reflection, and absorption spectrum of InSe (a), MoS<sub>2</sub>/InSe (b), and WS<sub>2</sub>/InSe (c) heterojunctions films, respectively.

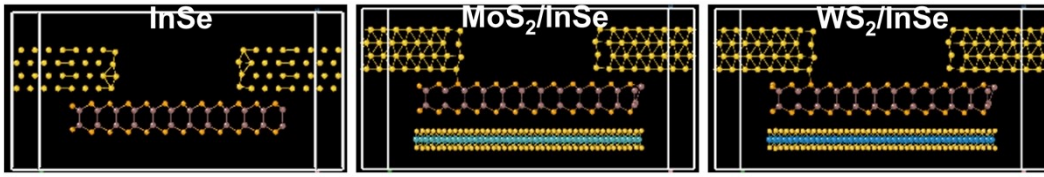

**Fig. S13** Theoretical model of Au-InSe and MS<sub>2</sub>/InSe heterojunctions electrodes.

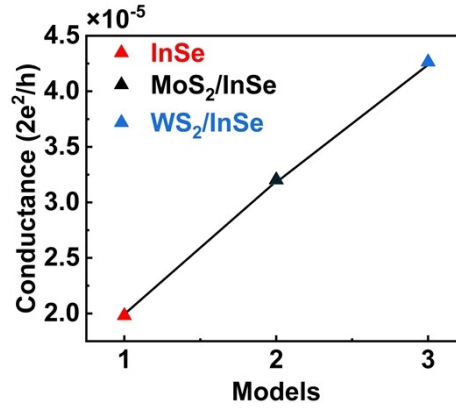

**Fig. S14** Conductivity of InSe and MS<sub>2</sub>/InSe heterojunctions transport devices.

**Tab. S1** calculates the carrier effective mass  $m^*$  ( $m_0$ ), deformation potential  $E_1$  (eV), planar stiffness  $C_{2D}$  (N/m), and electron mobility  $\mu$  ( $\text{cm}^2 \cdot \text{V}^{-1} \cdot \text{s}^{-1}$ ) of single-layer InSe and MoS<sub>2</sub>/InSe heterostructures along the x and y directions at room temperature.

| material               | $m_x^*$<br>( $m_0$ ) | $m_y^*$<br>( $m_0$ ) | $E_{1x}$<br>(eV) | $E_{1y}$<br>(eV) | $C_{2Dx}$<br>(N/m) | $C_{2Dy}$<br>(N/m) | $\mu_x$<br>( $\text{cm}^2 \text{V}^{-1} \text{s}^{-1}$ ) | $\mu_y$<br>( $\text{cm}^2 \text{V}^{-1} \text{s}^{-1}$ ) |
|------------------------|----------------------|----------------------|------------------|------------------|--------------------|--------------------|----------------------------------------------------------|----------------------------------------------------------|
| InSe                   | 0.24                 | 0.24                 | -6.67            | -7.14            | 54.69              | 108.01             | 476                                                      | 820                                                      |
| MoS <sub>2</sub> /InSe | 0.25                 | 0.25                 | -2.33            | -2.33            | 152.13             | 39.24              | 9730                                                     | 2510                                                     |

**Tab. S4** For reference, we list some previous calculations of the electron mobility of TMDs at room

temperature,<sup>12, 53, 61</sup> and experimental values.<sup>13, 52, 62</sup>

| material                             | $\mu_x$ (cm <sup>2</sup> V <sup>-1</sup> s <sup>-1</sup> )<br>1) | $\mu_y$ (cm <sup>2</sup> V <sup>-1</sup> s <sup>-1</sup> )<br>1) | $\mu_{exp}$ (cm <sup>2</sup> V <sup>-1</sup> s <sup>-1</sup> )<br>1) | Ref. |
|--------------------------------------|------------------------------------------------------------------|------------------------------------------------------------------|----------------------------------------------------------------------|------|
| MoS <sub>2</sub>                     | 271-285                                                          | —                                                                | —                                                                    | 12   |
| MoSe <sub>2</sub> /MoS <sub>2</sub>  | 400-423                                                          | —                                                                | —                                                                    | 12   |
| MoS <sub>2</sub>                     | —                                                                | —                                                                | 0.226                                                                | 13   |
| ReSe <sub>2</sub>                    | —                                                                | —                                                                | 0.226                                                                | 13   |
| MoS <sub>2</sub> /ReSe <sub>2</sub>  | —                                                                | —                                                                | 4                                                                    | 13   |
| SnS <sub>2</sub>                     | —                                                                | —                                                                | 0.6                                                                  | 52   |
| MoS <sub>2</sub>                     | —                                                                | —                                                                | 1.1                                                                  | 52   |
| SnS <sub>2</sub> /MoS <sub>2</sub>   | —                                                                | —                                                                | 27.26                                                                | 52   |
| InSe                                 | 1995                                                             | 1803                                                             | —                                                                    | 53   |
| BP                                   | 1030                                                             | 87                                                               | —                                                                    | 53   |
| InSe/BP                              | 2838                                                             | 3670                                                             | —                                                                    | 53   |
| InSe                                 | 1619.51                                                          | 1779.16                                                          | —                                                                    | 61   |
| Zr <sub>2</sub> CO <sub>2</sub>      | 57.55                                                            | 612.12                                                           | —                                                                    | 61   |
| InSe/Zr <sub>2</sub> CO <sub>2</sub> | 10942.98                                                         | 9293.66                                                          | —                                                                    | 61   |
| InSe                                 | —                                                                | —                                                                | 10 <sup>3</sup>                                                      | 62   |

**Tab. S5** Carrier concentration, Hall mobility, and resistivity of InSe and MoS<sub>2</sub>/InSe heterojunction.

|                        | Carrier Concentration                   | Hall mobility                                                      | Resistivity ( $\rho$ ) |
|------------------------|-----------------------------------------|--------------------------------------------------------------------|------------------------|
| InSe                   | $1.727 \times 10^{14}$ cm <sup>-3</sup> | $1.59 \times 10^3$ cm <sup>2</sup> V <sup>-1</sup> S <sup>-1</sup> | 22.67 $\Omega$ cm      |
| MoS <sub>2</sub> /InSe | $4.743 \times 10^{15}$ cm <sup>-3</sup> | $1.85 \times 10^3$ cm <sup>2</sup> V <sup>-1</sup> S <sup>-1</sup> | 0.711 $\Omega$ cm      |
